# Supplementary material for: Retinoic acid treated human dendritic cells induce T regulatory cells via the expression of CD141 and GARP which is impaired with age
Source: publisher site journal article supplement (doi:10.18632/aging.100973), 2016-05-30
Supplement: Supplementary file [file aging-v8i6-100973-supplementary-material-SD1.pdf]

37. Conway EM, Van de Wouwer M, Pollefeyt S, Jurk K, Van Aken H, De Vriese A, Weitz JI, Weiler H, Hellings PW, Schaeffer P, Herbert JM, Collen D and Theilmeier G. The lectin-like domain of thrombomodulin confers protection from neutrophil-mediated tissue damage by suppressing adhesion molecule expression via nuclear factor kappaB and mitogen-activated protein kinase pathways. *The Journal of experimental medicine*. 2002; 196:565-77.
38. Li Y, Kim BG, Qian S, Letterio JJ, Fung JJ, Lu L and Lin F. Hepatic Stellate Cells Inhibit T Cells through Active TGF-beta1 from a Cell Surface-Bound Latent TGF-beta1/GARP Complex. *Journal of immunology*. 2015; 195:2648-56.
39. Hahn SA, Stahl HF, Becker C, Correll A, Schneider FJ, Tuettenberg A and Jonuleit H. Soluble GARP has potent antiinflammatory and immunomodulatory impact on human CD4(+) T cells. *Blood*. 2013; 122:1182-91.

**SUPPLEMENTARY FIGURE**

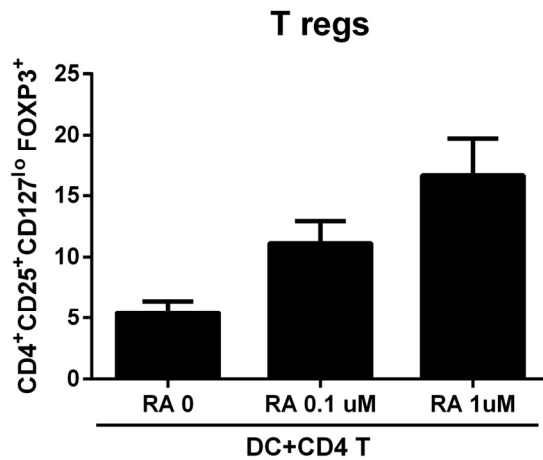

**Supplementary Figure 1. Determining of optimal concentration of RA.** DCs were exposed to RA at concentrations ranging from 0-10µM/ml for 24h. Subsequently the DCs were collected and cultured with purified, allogenic CD4+ T cells for 5 days. The T cells were collected at the end of the culture and stained for CD4, CD25, CD127 and Foxp3. Bar graph depicts the % of Tregs in the culture as determined by flow cytometry. RA concentration of 1 µM was found to be optimal. RA concentration of 10 µM was found to be toxic to DCs. Data is mean +/- S.E. of 4 experiments.
